# Supplementary material
Source: Springer Nature journal article supplement (https://www.springermedizin.de/resource/supplementary/13034_2014_264_MOESM1_ESM.pdf/9652668)
Supplement: MOESM1 [file 9652668]

# NAIVE PATIENTS TREATED WITH SECOND-GENERATION ANTIPSYCHOTIC

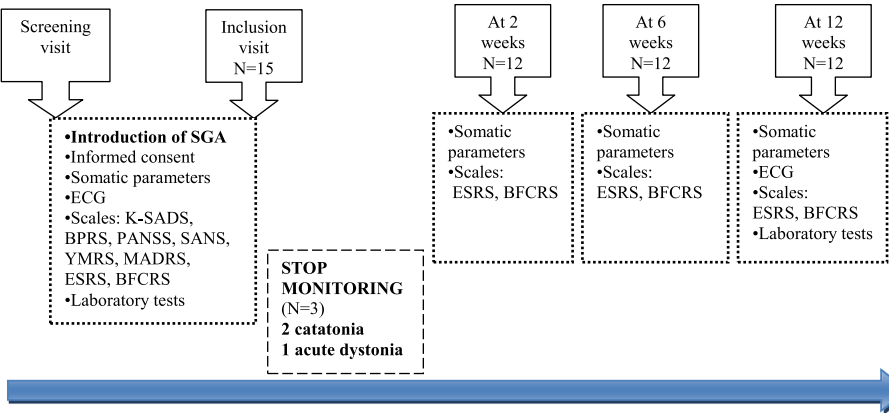

## ADVERSE EVENTS

TOTAL GROUP (N=15)

**Muscle weakness (8/15), extrapyramidal syndrome (8/15), akathisia (6/15), acute oro-facial dystonia (3/15), catatonia (2/15)**

COMPLETED GROUP (N=12)

**Weight gain of ~8 kg**  
**BMI increased significantly (p = 0.002)**
